# Supplementary material for: Artificial neural network identified the significant genes to distinguish Idiopathic pulmonary fibrosis
Source: PubMed Central journal article supplement (PMC9867697; doi:10.1038/s41598-023-28536-w), 2023-01-21

**Artificial Neural network identified the significant genes to distinguish Idiopathic pulmonary fibrosis**

Zhongzheng Li, Shenghui Wang, Huabin Zhao, Peishuo Yan, Hongmei Yuan, Mengxia Zhao, Ruyan Wan, Guoying Yu <sup>\*#</sup>, Lan Wang <sup>\*#</sup>

State Key Laboratory of Cell Differentiation and Regulation, Henan International Joint Laboratory of Pulmonary Fibrosis, Henan Center for Outstanding Overseas Scientists of Pulmonary Fibrosis, College of Life Science, Henan Normal University, Xinxiang, Henan 453007, China

\*Corresponding authors. #Contribute equally

**Correspondence to:**

Guoying Yu, PhD, Email: [guoyingyu@htu.edu.cn](mailto:guoyingyu@htu.edu.cn),

[Lan Wang](mailto:wanglan@htu.edu.cn), PhD, Email: [wanglan@htu.edu.cn](mailto:wanglan@htu.edu.cn)

[Tel:86-373-3326340](tel:86-373-3326340)

Henan Normal University, 46 Jianshe Road, Xinxiang, Henan 453007, China

**Supplemental figures legends:**

Figure S1 Association of DEGs expression with gender and age

A. Boxplot showing the association of the DEGs with gender, x-axis represents genders, y-axis represents gene expression.

B. Scatter plot showing the association of the DEGs with age, x-axis represents age, y-axis represents gene expression.

Figure S2

The forest plot displays the univariate Cox regression analysis results of the risk score and clinical factors with OS.

Figure S1

A

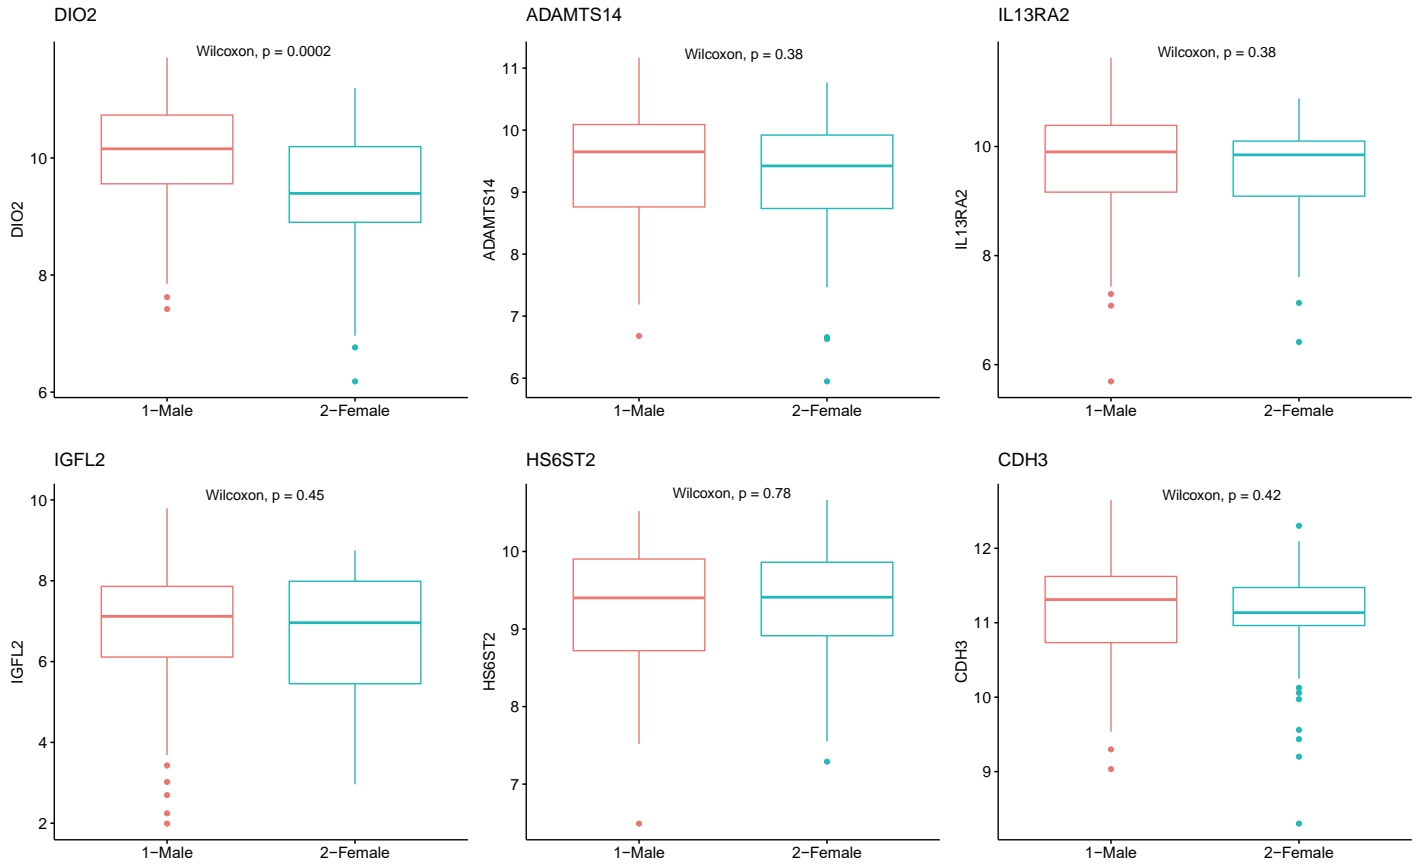

B

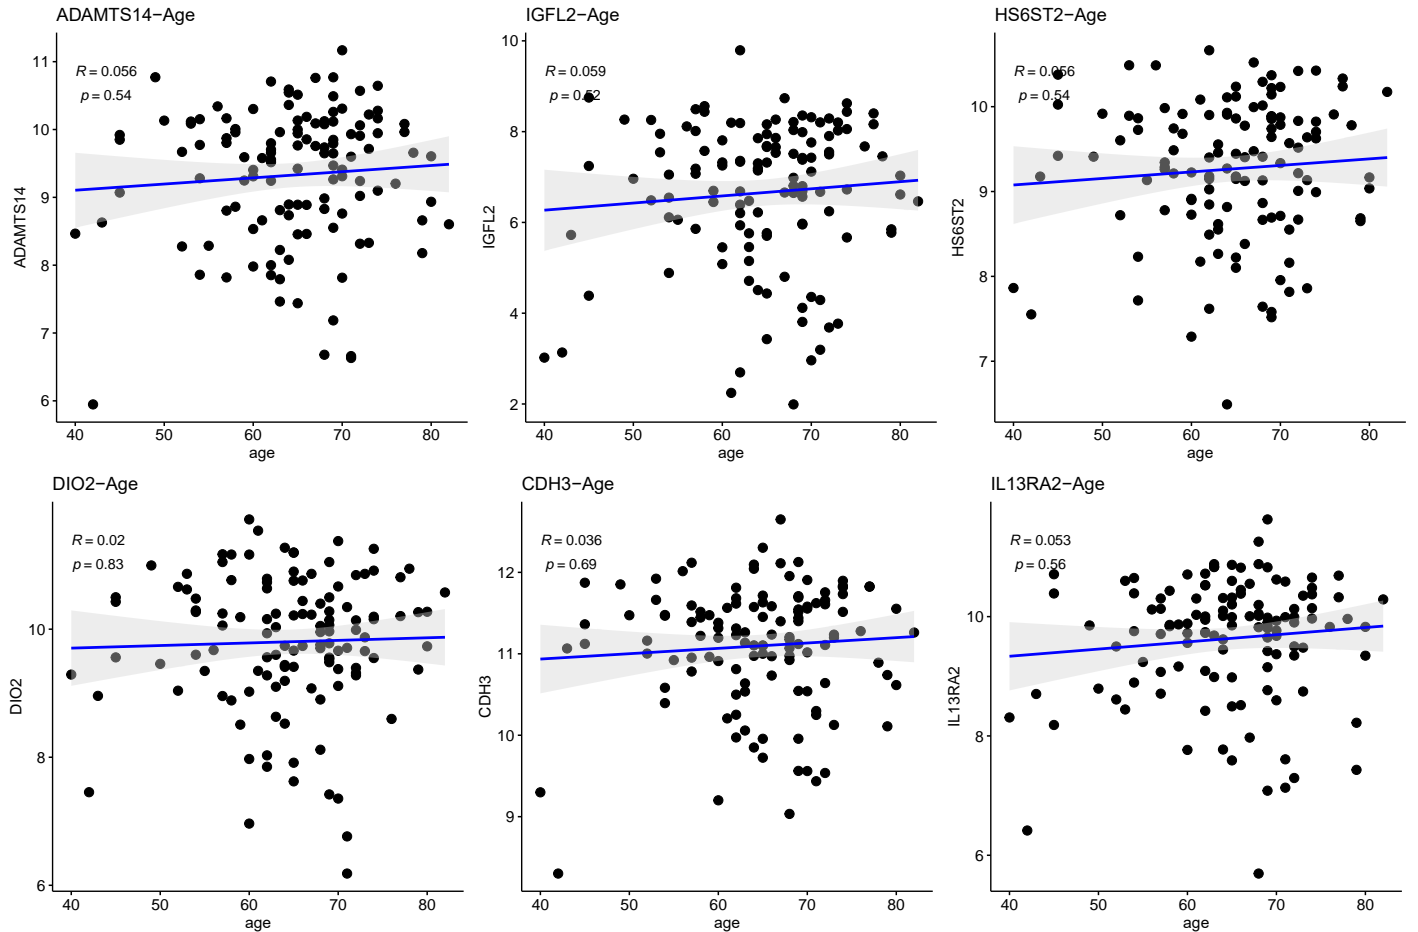

Figure S2

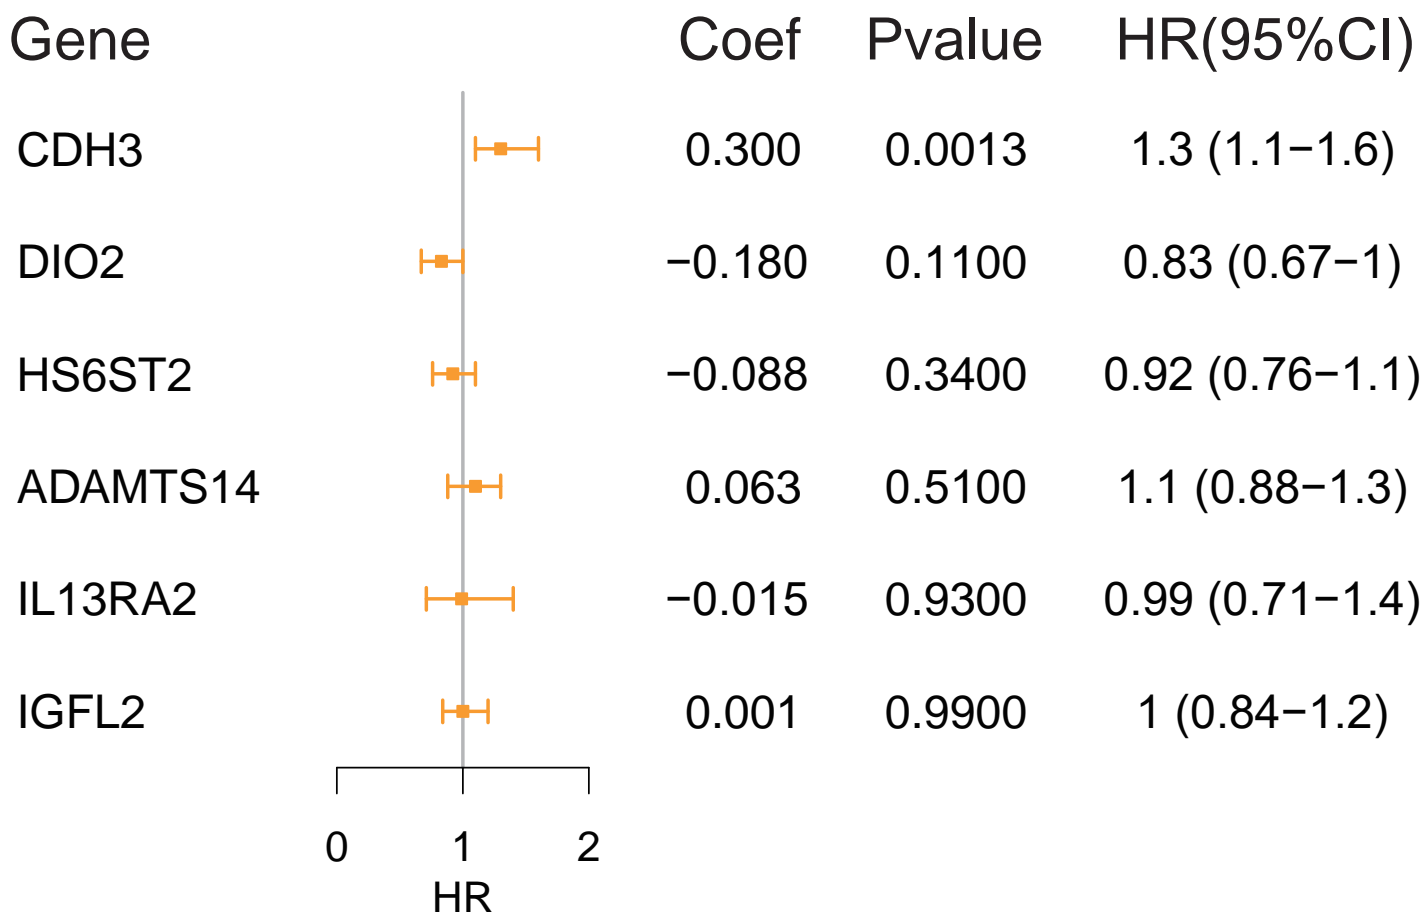

Supplement: 41598_2023_28536_MOESM1_ESM.pdf [file 41598_2023_28536_MOESM1_ESM.pdf]
